# Supplementary material for: CD248/endosialin critically regulates hepatic stellate cell proliferation during chronic liver injury via a PDGF-regulated mechanism
Source: HighWire-hosted journal article supplement (doi:10.1136/gutjnl-2014-308325), 2015-06-15

## Supplementary Figure 1

CD45 and F4/80 staining was performed on control and CCl<sub>4</sub> injured WT and CD248<sup>-/-</sup> mice to assess presence of pan-lymphocyte and macrophage populations.

### Supplementary Figure 1

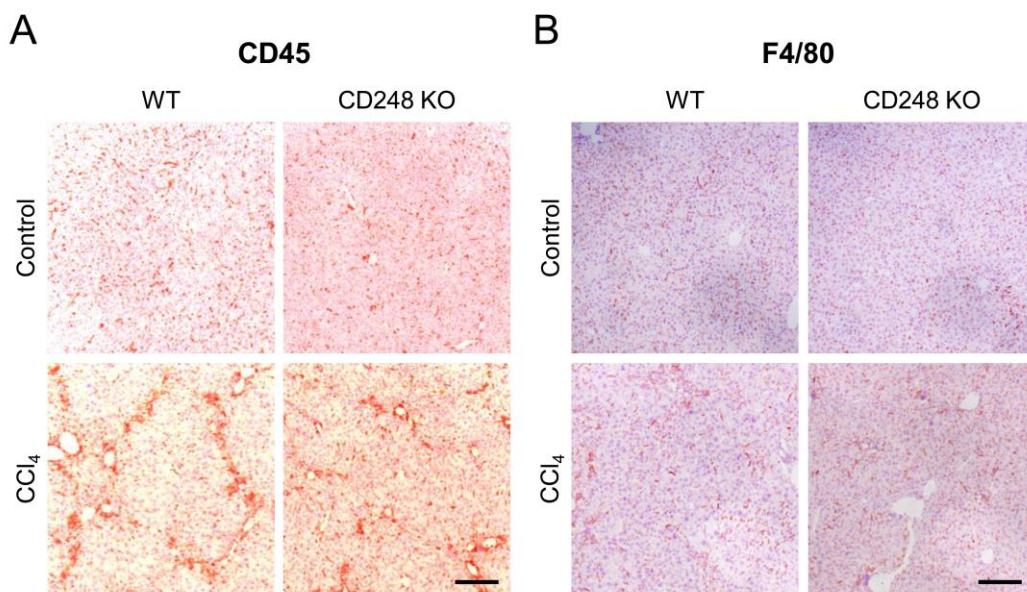

Supplement: gutjnl-2014-308325supp_figure.pdf [file gutjnl-2014-308325supp_figure.pdf]
